# Supplementary material
Source: HighWire-hosted journal article supplement (https://ard.bmj.com/highwire/filestream/202369/field_highwire_adjunct_files/0/ARD_table_1_136218.docx)
Supplement: ARD_table_1_136218.docx [file ARD_table_1_136218.docx]

**Supplementary Table 1.** Summary of replicated loci associated with serum urate concentrations in genome-wide association study meta-analysis with all references related to gout association included [1, 2]

| Loci | Encoded protein | Function of encoded protein | Encoded protein present in renal tubular cells? | Explained variance from meta-analysis (%) | Associated with gout? |
| --- | --- | --- | --- | --- | --- |
| SLC2A9 | solute carrier family 2, member 9 protein (SLC2A9) | High capacity urate transporter.  Glucose and fructose transporter. | Yes | 3.53% | Yes [3-7] |
| *ABCG2* | human ATP-binding cassette, subfamily G, 2 (ABCG2) | Urate transporter.  Also known as also known as breast cancer resistance protein, functioning as an efflux pump. | Yes | 0.57% | Yes [5, 8, 9] |
| *PDZK1* | PDZ domain-containing 1 | A scaffolding protein that interacts with OAT4, URAT1 and NTP1. | Yes | 0.19% | No [9] |
| *SLC17A1* | renal sodium phosphate transport protein 1 (NPT1) | Voltage driven urate transporter. | Yes | 0.19% | Yes [5, 10] |
| *SLC22A11* | organic anion transporter 4 (OAT4) | Organic anion-dicarboxylate exchanger, mediates urate transport. | Yes | 0.19% | No [9] |
| *SLC16A9* | Monocarboxylic acid transporter 9 (MCT9) | Monocarboxylate co-transporter, ?urate transporter. | Yes | 0.17% | No [9] |
| *GCKR* | Glucokinase regulatory protein | Hepatic glucose sensor, associated with serum triglyceride concentrations. | No (liver and pancreatic islet cells) | 0.13% | No [9] |
| *SLC22A12* | Urate anion exchanger 1 (URAT1) | Organic anion transporter, non-voltage dependent exchange for urate. | Yes | 0.13% | Yes [11, 12] |

**Supplementary table references**

1. Kolz M, Johnson T, Sanna S, Teumer A, Vitart V, Perola M, et al. Meta-analysis of 28,141 individuals identifies common variants within five new loci that influence uric acid concentrations. PLoS Genet. 2009 Jun; 5(6):e1000504.

2. van der Harst P, Bakker SJ, de Boer RA, Wolffenbuttel BH, Johnson T, Caulfield MJ, et al. Replication of the five novel loci for uric acid concentrations and potential mediating mechanisms. Hum Mol Genet. Jan 15; 19(2):387-395.

3. Stark K, Reinhard W, Neureuther K, Wiedmann S, Sedlacek K, Baessler A, et al. Association of common polymorphisms in GLUT9 gene with gout but not with coronary artery disease in a large case-control study. PLoS One. 2008; 3(4):e1948.

4. Vitart V, Rudan I, Hayward C, Gray NK, Floyd J, Palmer CN, et al. SLC2A9 is a newly identified urate transporter influencing serum urate concentration, urate excretion and gout. Nat Genet. 2008 Apr; 40(4):437-442.

5. Dehghan A, Kottgen A, Yang Q, Hwang SJ, Kao WL, Rivadeneira F, et al. Association of three genetic loci with uric acid concentration and risk of gout: a genome-wide association study. Lancet. 2008 Dec 6; 372(9654):1953-1961.

6. Tu HP, Chen CJ, Tovosia S, Ko AM, Lee CH, Ou TT, et al. Associations of a nonsynonymous variant in SLC2A9 with gouty arthritis and uric acid levels in Han Chinese and Solomon Islanders. Ann Rheum Dis. 2009 Sep 9.

7. Hollis-Moffatt JE, Xu X, Dalbeth N, Merriman ME, Topless R, Waddell C, et al. Role of the urate transporter SLC2A9 gene in susceptibility to gout in New Zealand Maori, Pacific Island, and Caucasian case-control sample sets. Arthritis Rheum. 2009 Nov; 60(11):3485-3492.

8. Woodward OM, Kottgen A, Coresh J, Boerwinkle E, Guggino WB, Kottgen M. Identification of a urate transporter, ABCG2, with a common functional polymorphism causing gout. Proc Natl Acad Sci U S A. 2009 Jun 23; 106(25):10338-10342.

9. Stark K, Reinhard W, Grassl M, Erdmann J, Schunkert H, Illig T, et al. Common polymorphisms influencing serum uric acid levels contribute to susceptibility to gout, but not to coronary artery disease. PLoS One. 2009; 4(11):e7729.

10. Urano W, Taniguchi A, Anzai N, Inoue E, Kanai Y, Yamanaka M, et al. Sodium-dependent phosphate cotransporter type 1 (NPT1) sequence polymorphisms in male patients with gout. Ann Rheum Dis. 2009 Jun 24.

11. Tu HP, Chen CJ, Lee CH, Tovosia S, Ko AM, Wang SJ, et al. SLC22A12 Gene is Associated with Gout in Han Chinese and Solomon Islanders. Ann Rheum Dis. 2009 Sep 17.

12. Vazquez-Mellado J, Jimenez-Vaca AL, Cuevas-Covarrubias S, Alvarado-Romano V, Pozo-Molina G, Burgos-Vargas R. Molecular analysis of the SLC22A12 (URAT1) gene in patients with primary gout. Rheumatology (Oxford). 2007 Feb; 46(2):215-219.
